# Supplementary material for: Deletion of UCP1 in Tg2576 Mice Increases Body Temperature and Exacerbates Alzheimer’s Disease-Related Pathologies
Source: MDPI journal article supplement (doi:10.3390/ijms24032741), 2023-02-01
Supplement: s1 [file s1]

Supplementary Table S1. List of antibodies used in the study.

| Antibodies                    | Species | Dilution | Source         | Cat. No.   |
|-------------------------------|---------|----------|----------------|------------|
| Primary antibodies            |         |          |                |            |
| ABCA1                         | Mouse   | 1:1000   | Abcam          | AB18180    |
| ADAM10                        | Rabbit  | 1:1000   | Millipore      | AB19026    |
| ApoE                          | Goat    | 1:1000   | Millipore      | AB947      |
| APP                           | Mouse   | 1:1000   | Millipore      | MAB348     |
| BACE1                         | Mouse   | 1:1000   | R&D            | MAB931     |
| APP-CTF                       | Rabbit  | 1:1000   | Sigma          | A8717      |
| IDE                           | Rabbit  | 1:1000   | Covance        | PRB-282C   |
| NEP                           | Goat    | 1:1000   | R&D            | AF1126     |
| PS1                           | Mouse   | 1:1000   | Millipore      | MAB5232    |
| sAPP $\beta$                  | Mouse   | 1:1000   | IBL            | 10321      |
| total tau                     | Mouse   | 1:1000   | BioLegend      | 806401     |
| Tau p-S404                    | Rabbit  | 1:1000   | Invitrogen     | 44758ZG    |
| Tau p-S422                    | Rabbit  | 1:1000   | Invitrogen     | 44764ZG    |
| Tau p-T231                    | Mouse   | 1:1000   | Invitrogen     | MN1040     |
| HSP60                         | Mouse   | 1:2000   | BD Biosciences | 611562     |
| HSP70                         | Rabbit  | 1:2000   | Bioworld       | BS2741     |
| HSP90                         | Mouse   | 1:2000   | BD Biosciences | 610418     |
| Total GSK3 $\alpha/\beta$     | Rabbit  | 1:1000   | Cell Signaling | 5676       |
| p-GSK3 $\alpha/\beta$ (S21/9) | Rabbit  | 1:2000   | Cell Signaling | 8566       |
| Total JNK                     | Rabbit  | 1:1000   | Cell Signaling | 9258       |
| p-JNK (T183/Y185)             | Mouse   | 1:1000   | Cell Signaling | 9255       |
| Total ERK                     | Rabbit  | 1:2000   | Cell Signaling | 9102       |
| p-ERK (T202/Y204)             | Mouse   | 1:1000   | Cell Signaling | 9106       |
| Total p38                     | Rabbit  | 1:1000   | Cell Signaling | 9212       |
| p-p38 (T180/Y182)             | Rabbit  | 1:1000   | Cell Signaling | 9211       |
| $\alpha$ -Tubulin             | Rabbit  | 1:2000   | Cell Signaling | 2148       |
| Syntaxin                      | Mouse   | 1:1000   | Sigma          | SAB4200841 |
| Synaptotagmin (SYT)           | Mouse   | 1:1000   | BD Biosciences | 610433     |
| PSD95                         | Rabbit  | 1:1000   | Cell Signaling | 3450       |
| GFAP                          | Mouse   | 1:1000   | Sigma          | G3893      |
| Iba1                          | Rabbit  | 1:1000   | Wako           | 019-19741  |
| Secondary antibodies          |         |          |                |            |
| Anti-rabbit IgG, HRP-linked   | Goat    | 1:5000   | Cell Signaling | 7074       |
| Anti-mouse IgG, HRP-linked    | Goat    | 1:5000   | Cell Signaling | 7076       |
